# Supplementary material for: Five copper homeostasis gene clusters encode the Cu-efflux resistome of the highly copper-tolerant Methylorubrum extorquens AM1
Source: PeerJ journal article supplement (doi:10.7717/peerj.14925), 2023-02-20

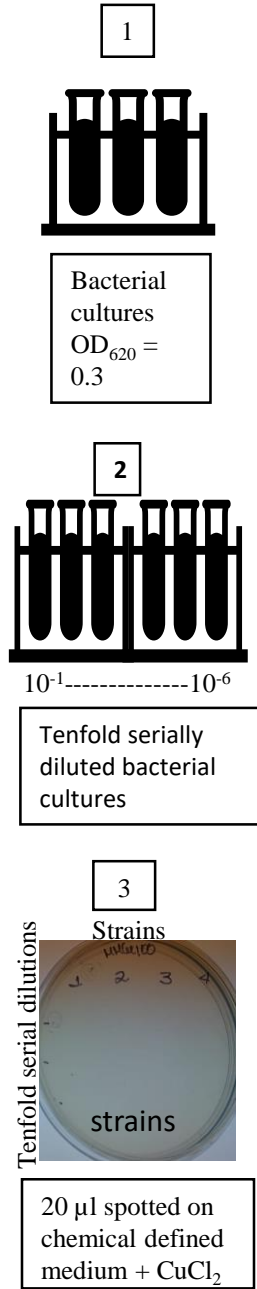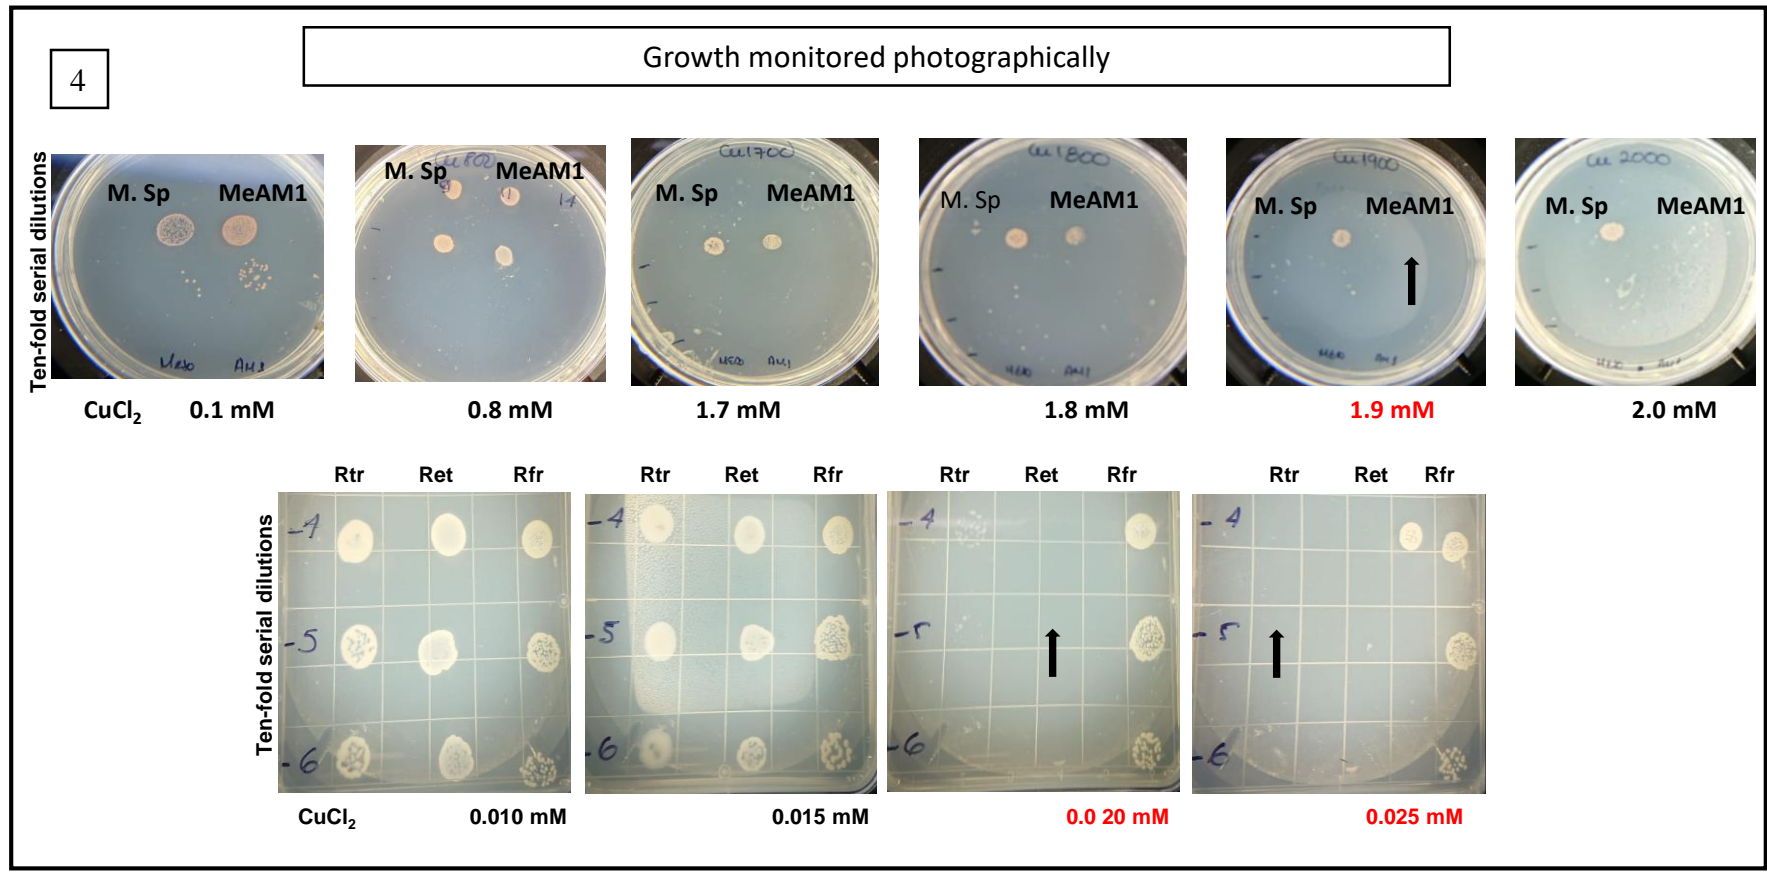

Supplement: FigS3.pdf [file FigS3.pdf]
