# Supplementary material for: Five copper homeostasis gene clusters encode the Cu-efflux resistome of the highly copper-tolerant Methylorubrum extorquens AM1
Source: PeerJ. 2023 Feb 20;11:e14925. doi: 10.7717/peerj.14925 (PMC9948745; doi:10.7717/peerj.14925)
Supplement: Supplemental Information 7 [file peerj-11-14925-s007.xlsx]

## Sheet: Hoja1
PAFD Genomes
Rhizobium etli CFN42				Rhizobium tropici CIAT899				Rhizobium freirei PRF81				Rhizobium leguminosarum bv viciae 3841				Sinorhizobium meliloti 1021				Sinorhizobium fredii NGR234
Replicons	RefSeq	INSDC		Replicons	RefSeq	INSDC		Replicons	RefSeq	INSDC		Replicons	RefSeq	INSDC		Replicons	RefSeq	INSDC		Replicons	RefSeq	INSDC
Chromosome	NC_007761.1	CP000133.1		Chromosome	NC_020059.1	CP004015.1		Chromosome	NZ_AQHN00000000.1	AQHN00000000.1		Chromosome	NC_008380.1	AM236080.1		Chromosome	NC_003047.1	AL591688.1		Chromosome	NC_012587.1	CP001389.1
Plasmid p42a	NC_007762.1	CP000134.1		pRtCIAT899a	NC_020060.1	CP004016.1		pPRF81a	NZ_AQHN01000095.1	AQHN01000095.1		pRL7	NC_008382.1	AM236081.1		MpSymA	NC_003037.1	AE006469.1		pNGRa	NC_000914.2	U00090.2
Plasmid p42b	NC_007763.1	CP000135.1		pRtCIAT899b	NC_020061.1	CP004017.1		pPRF81b	NZ_AQHN01000096.1	AQHN01000096.1		pRL8	NC_008383.1	AM236082.1		MpSymB	AL591985.1	NC_003078.1		pNGRb	NC_012586.1	CP000874.1
Plasmid p42c	NC_007764.1	CP000136.1		MpRtCIAT899c	NC_020062.1	CP004018.1						pRL9	NC_008379.1	AM236083.1
Plasmid p42d	NC_004041.2	U80928.5										pRL10	NC_008381.1	AM236084.1
Plasmid p42e	NC_007765.1	CP000137.1										pRL11	NC_008384.1	AM236085.1
Plasmid p42f	NC_007766.1	CP000138.1										pRL12	NC_008378.1	AM236086.1
Sinorhizobium fredii GR64				Mesorhizobium loti MAFF303099
Replicons	WGS			Replicons	RefSeq	INSDC
Contig	AMCX00000000			Chromosome	NC_002678.2	BA000012.4
				pMLa	NC_002679.1	BA000013.4
				pMLb	NC_002682.1	AP003017.1
PPFM Genomes
Methylorubrum extorquens AM1				Methylorubrum extorquens TK0001				Methylobacterium radiotolerance JCM2831				Methylobacterium organophilum DSM760				Methylobacterium nodulans ORS2060
Replicons	RefSeq	INSDC		Replicons	RefSeq	INSDC		Replicons	RefSeq	INSDC		Replicons	WGS	INSDC		Replicons	RefSeq	INSDC
Chromosome	NC_012808.1	CP001510.1		Chromosome	LT962688.1	NZ_LT962688.1		Chromosome	NC_010505.1	CP001001.1		Contig	QEKZ00000000			Chromosome	NC_011894.1	CP001349.1
Megaplasmid	NC_012811.1	CP001511.1						pMRAD01	NC_010510.1	CP001002.1						pMNOD01	NC_011892.1	CP001350.1
p1META1	NC_012807.1	CP001512.1						pMRAD02	NC_010509.1	CP001003.1						pMNOD02	NC_011887.1	CP001351.1
p2META1	NC_012809.1	CP001513.1						pMRAD03	NC_010514.1	CP001004.1						pMNOD03	NC_011893.1	CP001352.1
p3META1	NC_012810.1	CP001514.1						pMRAD04	NC_010517.1	CP001005.1						pMNOD04	NC_011895.1	CP001353.1
								pMRAD05	NC_010518.1	CP001006.1						pMNOD05	NC_011888.1	CP001354.1
								pMRAD06	NC_010502.1	CP001007.1						pMNOD06	NC_011889.1	CP001355.1
								pMRAD07	NC_010504.1	CP001008.1						pMNOD07	NC_011890.1	CP001356.1
								pMRAD08	NC_010507.1	CP001009.1
