# Supplementary material for: Five copper homeostasis gene clusters encode the Cu-efflux resistome of the highly copper-tolerant Methylorubrum extorquens AM1
Source: PeerJ. 2023 Feb 20;11:e14925. doi: 10.7717/peerj.14925 (PMC9948745; doi:10.7717/peerj.14925)
Supplement: Supplemental Information 8 [file peerj-11-14925-s008.xlsx]

## Sheet: Hoja1
				CuCl2 (Mm)
NUMBER	PAFD strains (Abbreviation)			0.015	0.02	0.025	0.03	0.08	0.085	0.09	0.095	0.1
1	Rhizobium etli CFN42 (Ret)			Pa	Ib	I	I	I	I	I	I	I
2	R. leguminosarum bv viciae 3841 (Rle)			P	I	I	I	I	I	I	I	I
3	Sinorhizobium fredii GR64 (SfGR)			P	I	I	I	I	I	I	I	I
4	R. tropici CIAT899 (Rtr)			P	P	I	I	I	I	I	I	I
5	Mesorhizbium loti MAFF303099 (Mlo)			P	P	I	I	I	I	I	I	I
6	S. meliloti 1021 (Sme)			P	P	P	I	I	I	I	I	I
7	S. fredii NGR234 (SfNGR)			P	P	P	P	P	P	I	I	I
8	R. freirei PRF81 (Rfr)			P	P	P	P	P	P	P	P	I
				CuCl2 (Mm)
NUMBER	PPFM strains (Abbreviation)			0.07	0.075	0.12	0.125	0.145	0.15	0.75	0.8	0.85	1.85	1.9	2
1	Methylorubrum extorquens TK0001 (MeTK)			P	I	I	I	I	I	I	I	I	I	I	I
2	Methylobacterium nodulans ORS2060 (Mno)			P	P	P	I	I	I	I	I	I	I	I	I
3	Methylobacterium radiotolerans AM1 (Mra)			P	P	P	P	P	I	I	I	I	I	I	I
4	Methylobacterium orgaophilum JCM2832 (Mor)			P	P	P	P	P	P	P	I	I	I	I	I
5	Methylorubrum extorquens AM1 (MeAM)			P	P	P	P	P	P	P	P	P	P	I	I
aP: growth permissive
bI: growth inhibitory
